# Supplementary material for: Identification and Characterization of Shaker K+ Channel Gene Family in Foxtail Millet (Setaria italica) and Their Role in Stress Response
Source: Front Plant Sci. 2022 Jun 9;13:907635. doi: 10.3389/fpls.2022.907635 (PMC9218596; doi:10.3389/fpls.2022.907635)
Supplement: Supplementary file 1 [file Table_1.XLSX]

## Sheet: Sheet1
Supplement Table 1. The primers used in this study
Primer name	Primer sequence
SiKAT1-F	CCAGGCGGCTTCAGAGTT
SiKAT1-R	CCTTGCACGACCGGATAG
SiKAT2-F	GGTCCATTACAACGCTCACAACAAC
SiKAT2-R	GTATGCTGTCAGTCCCAGGTTAAAGAG
SiKAT3-F	TCCATTCCAACCAATCAGCCTTCTG
SiKAT3-R	AGACGCCACAGCCTCAACATATTG
SiAKT1-F	AACCTTGGATTGACTGCCTACTTGATC
SiAKT1-R	GCTGGTTGCTGCTTGAATTGTATCTC
SiAKT2-F	GCTACGCTGCATCCAAAGGA
SiAKT2-R	GAGCAGAAGCCTCACGCATT
SiAKT2/3-F	AGCGTCGTCATCATCAAGAACTTCC
SiAKT2/3-R	ACCGTCAGCACATTATTAGCATCGTC
SiGORK-F	CTCACTGTACTTCGCCATCGTCAC
SiGORK-R	TGAGGAGGATGCTGAAGGAGATGTAC
SiSKOR-F	ACTGGAAGGTGTTGGCATTGGTC
SiSKOR-R	CGTGTAGGGCTGCGGTATGTTG
SiKC1a-F	TCGGCCTGACCTCCTACA
SiKC1a-R	CTCGCCATCATCTGCTCC
SiKC1b-F	CGGAGGAGCGAGATGATGG
SiKC1b-R	CGAGCTTCCCTGTCTTATTTGC
SiActin2-F	CGCATATGTGGCTCTTGACT
SiActin2-R	GGGCACCTAAATCTCTCTGC
BZ-S-NruI-ZMT	AGCTCGCGAACTCCAAGCTGCCTTTGTGT
BZ-A-NdeI-ZMT	GTTATTACTGAGTAGTATTCATATGAAG
GWF-SiKAT3	GGGGACAAGTTTGTACAAAAAAGCAGGCTTAATGTTCATCACCTGCAGC
GWR-SiKAT3	GGGGACCACTTTGTACAAGAAAGCTGGGTCCATCTGAAGAAGGAATAGGTGG
GWF-SiKAT2	GGGGACAAGTTTGTACAAAAAAGCAGGCTTAATGGAAGATGTTAGCAATATATTCC
GWR-SiKAT2	GGGGACCACTTTGTACAAGAAAGCTGGGTCAGACTCCATAAGAAACAAATGG
GWF-SiSYP121	GGGGACAAGTTTGTACAAAAAAGCAGGCTTAATGAACAGCCTGTTCTCG
GWR-SiSYP121	GGGGACCACTTTGTACAAGAAAGCTGGGTCTACTTCTTGGTGTTGTTG
GWF-SiVAMP721	GGGGACAAGTTTGTACAAAAAAGCAGGCTTAATGGCGATCCTGTACGCGC
GWR-SiVAMP721	GGGGACCACTTTGTACAAGAAAGCTGGGTCTACCGTATACAAGTTGGT
GWF-SiSNAP33	GGGGACAAGTTTGTACAAAAAAGCAGGCTTAATGTCTGTGTCAATGTAT
GWR-SiSNAP33	GGGGACCACTTTGTACAAGAAAGCTGGGTTCACTTGCCCAGCAACCGG
GWF-SiAKT1	GGGGACAAGTTTGTACAAAAAAGCAGGCTTAATGGCGGGGTGGGGGTC
GWR-SiAKT1	GGGGACCACTTTGTACAAGAAAGCTGGGTCCTTCTCGTCAGGCCTTATTTG
GWF-SiAKT2/3	GGGGACAAGTTTGTACAAAAAAGCAGGCTTAATGACGCTGATCTGCGGGCCAC
GWR-SiAKT2/3	GGGGACCACTTTGTACAAGAAAGCTGGGTCTTGATCCCTACCCACGATGCC
F-SiKC1a	CCTCGACGGACTGCTACATC
R-SiKC1a	GTCTCTTCGTGTTGCTGGG
F-SiKC1b	TGCTACATCATCGTGTCCGG
R-SiKC1b	TCTCCGATCAGCCTCTTCC
F-SiAct2	ACTGGTGTGATGGTTGGCAT
R-SiAct2	CAAGACGGAGGATGGCATG
F-SiAKT1	TAGCACCAAGTCACCGTGTC
R-SiAKT1	TCTCAGCACCTTCAACCGTC
